# Supplementary material
Source: MDPI journal article supplement (https://www.mdpi.com/2071-1050/13/9/4598)
Supplement: s1 [file s1 › sustainability-1147323-supplementary.pdf]

## Supplementary materials

**Table S1.** Complete list of 43 indicators studied according to the different subgroups they define and their weight, as used to determine the 10 habitability indexes explained in section 2.3. Weights assigned to each indicator are coefficients that add up to 1 within each index.

| Habitability dimensions | Indicator Subgroup                                      | Indicator                                                              | Weights |
|-------------------------|---------------------------------------------------------|------------------------------------------------------------------------|---------|
| Availability of space   | Usable area (A1)                                        | Usable dwelling area                                                   | 0.50    |
|                         |                                                         | Dimensions of entranceway                                              | 0.13    |
|                         |                                                         | Availability and area of private exterior spaces                       | 0.25    |
|                         |                                                         | Area of shared rooftop                                                 | 0.05    |
|                         |                                                         | Area of entranceway                                                    | 0.07    |
|                         | Usable space/resident (A2)                              | Usable dwelling space/resident (A2)                                    | 0.72    |
|                         |                                                         | Usable entranceway space/resident                                      | 0.19    |
|                         |                                                         | Usable rooftop space/resident                                          | 0.08    |
|                         | Overcrowding signs (A3)                                 | Signs of overcrowding in private exterior spaces(A3)                   | 0.90    |
|                         |                                                         | Signs of overcrowding in shared spaces                                 | 0.10    |
| Light and ventilation   | Ventilation and illumination of dwelling interiors (B1) | Distance to the most distant opposing façade                           | 0.10    |
|                         |                                                         | Surface area of lightwell                                              | 0.09    |
|                         |                                                         | Smallest dimension of lightwell                                        | 0.06    |
|                         |                                                         | Exterior perimeter                                                     | 0.37    |
|                         |                                                         | Façade width                                                           | 0.21    |
|                         |                                                         | Façade orientation                                                     | 0.03    |
|                         |                                                         | Number of exterior façades                                             | 0.14    |
|                         | Ventilation and illumination of common spaces (B2)      | Ventilation of stairwell                                               | 0.32    |
|                         |                                                         | Ventilation of entryway                                                | 0.04    |
|                         |                                                         | Natural illumination of stairwell                                      | 0.32    |
|                         |                                                         | Natural illumination of entryway                                       | 0.12    |
|                         |                                                         | Feasibility of improving ventilation and illumination of shared spaces | 0.19    |
|                         |                                                         |                                                                        |         |
| State of repair         | Accessibility (B3)                                      | Availability of elevator                                               | 0.79    |
|                         |                                                         | Accessibility of front door                                            | 0.07    |
|                         |                                                         | Accessibility of entryway                                              | 0.13    |
|                         | State of repair of dwellings (C1)                       | State of repair of exterior façade of dwelling                         | 0.21    |
|                         |                                                         | State of repair of interior façade of dwelling                         | 0.31    |
|                         |                                                         | State of repair of roof of dwelling                                    | 0.04    |
|                         |                                                         | State of repair of exterior spaces of dwelling                         | 0.08    |
|                         | State of repair of common spaces (C2)                   | State of repair of woodwork                                            | 0.36    |
|                         |                                                         | State of repair of exterior façade                                     | 0.22    |
|                         |                                                         | State of repair of interior façade                                     | 0.33    |
|                         |                                                         | State of repair of rooves                                              | 0.17    |
|                         |                                                         | State of repair of interior common spaces                              | 0.16    |
|                         |                                                         | State of repair of inner courtyard                                     | 0.05    |
|                         |                                                         | No rehabilitation work in the last 10 years                            | 0.07    |
|                         | Maintenance (C3)                                        | Maintenance of dwelling                                                | 0.72    |
|                         |                                                         | Maintenance of common spaces                                           | 0.17    |
|                         |                                                         | Maintenance of rooves                                                  | 0.10    |
|                         | Appropriation (C4)                                      | Appropriation of dwelling                                              | 0.72    |

---

|                                |      |
|--------------------------------|------|
| Appropriation of common spaces | 0.08 |
| Appropriation of rooves        | 0.19 |

---
